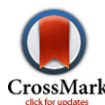

## Correction

# Correction: Phthalates Induce Neurotoxicity Affecting Locomotor and Thermotactic Behaviors and AFD Neurons through Oxidative Stress in *Caenorhabditis elegans*

I-Ling Tseng, Ying-Fei Yang, Chan-Wei Yu, Wen-Hsuan Li, Vivian Hsiu-Chuan Liao

The authors would like to acknowledge that the article contains overlap in text with that from our previous publication [1] (reference 43 in the original article) and fragments in the text that overlap word-for-word with text from our previous publication [2] and a publication in *Environ Toxicol Pharmacol* [3] (reference 42 in the original article).

The authors apologize for the overlap, for omitting to cite the publication [2] and for not properly quoting the text from [1, 2, 3]. The overlap in text relates to some of the information described in the Introduction section and to the description of the methodology under the Materials and Methods section.

However, it should be noted that the identified issues have no bearing on the results and conclusions of the study.

## Reference

1. Li WH, Shi YC, Tseng IL, Liao VH (2013) Protective efficacy of selenite against lead-induced neurotoxicity in *Caenorhabditis elegans*. *PLoS One* 8: e62387.
2. Liao VH, Liu JT, Li WH, Yu CW, Hsieh YC (2010) *Caenorhabditis elegans* bicarbonate transporter ABTS-1 is involved in arsenite toxicity and cholinergic signaling. *Chem Res Toxicol*. 2010 May 17;23(5):926-32.
3. Xing X, Du M, Xu X, Rui Q, Wang D (2009) Exposure to metals induces morphological and functional alteration of AFD neurons in nematode *Caenorhabditis elegans*. *Environ Toxicol Pharmacol* 28: 104-110.
4. Tseng I-L, Yang Y-F, Yu C-W, Li W-H, Liao VH-C (2013) Phthalates Induce Neurotoxicity Affecting Locomotor and Thermotactic Behaviors and AFD Neurons through Oxidative Stress in *Caenorhabditis elegans*. *PLoS ONE* 8(12): e82657. doi:10.1371/journal.pone.0082657

**Citation:** Tseng I-L, Yang Y-F, Yu C-W, Li W-H, Liao VH-C (2014) Correction: Phthalates Induce Neurotoxicity Affecting Locomotor and Thermotactic Behaviors and AFD Neurons through Oxidative Stress in *Caenorhabditis elegans*. *PLoS ONE* 9(6): e99945. doi:10.1371/journal.pone.0099945

**Published:** June 4, 2014

**Copyright:** © 2014 Tseng et al. This is an open-access article distributed under the terms of the Creative Commons Attribution License, which permits unrestricted use, distribution, and reproduction in any medium, provided the original author and source are credited.
